# Supplementary material for: Associations of the Neutrophil-to-Lymphocyte Ratio and Platelet-to-Lymphocyte Ratio with Osteoporosis: A Meta-Analysis
Source: MDPI journal article supplement (doi:10.3390/diagnostics12122968), 2022-11-28
Supplement: s1 [file s1]

# Associations of the Neutrophil-to-lymphocyte Ratio and Platelet-to-lymphocyte Ratio with Osteoporosis: A Meta-Analysis

Yu-Cheng Liu, Tzu-I Yang, Shu-Wei Huang, Yi-Jie Kuo, and Yu-Ping Chen

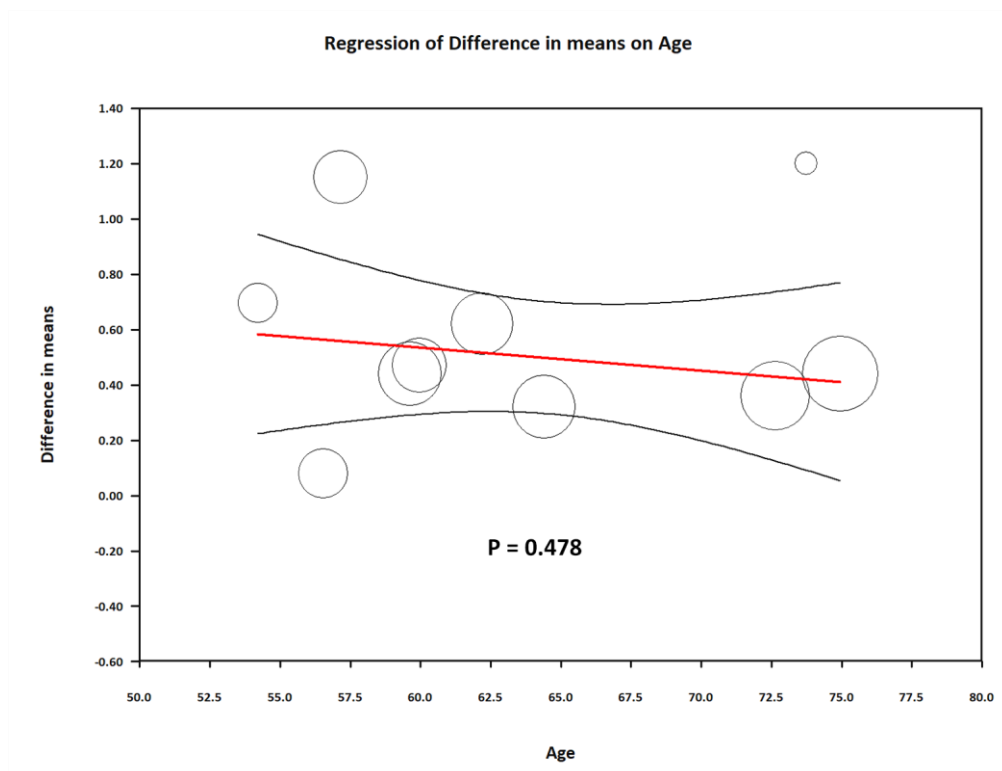

**Figure S1.** Meta regression of age and mean difference in NLR.

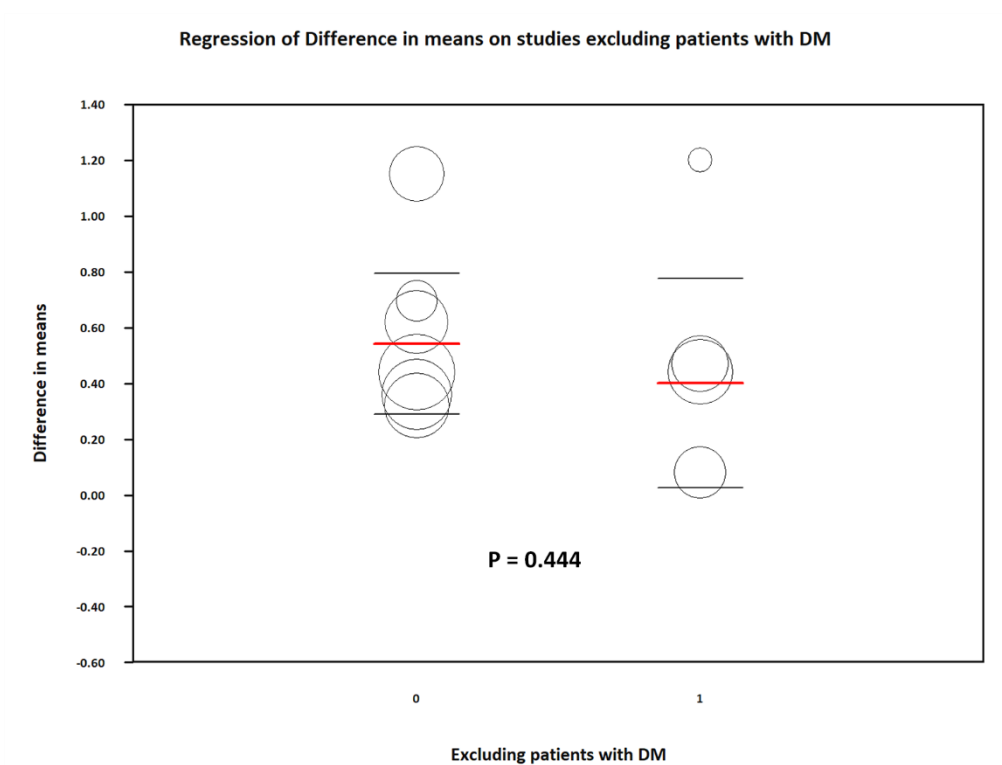

**Figure S2.** Meta regression of the exclusion of DM patients and mean difference in NLR.

DM, diabetes mellitus; 1, DM patients excluded; 0, DM patients not excluded.

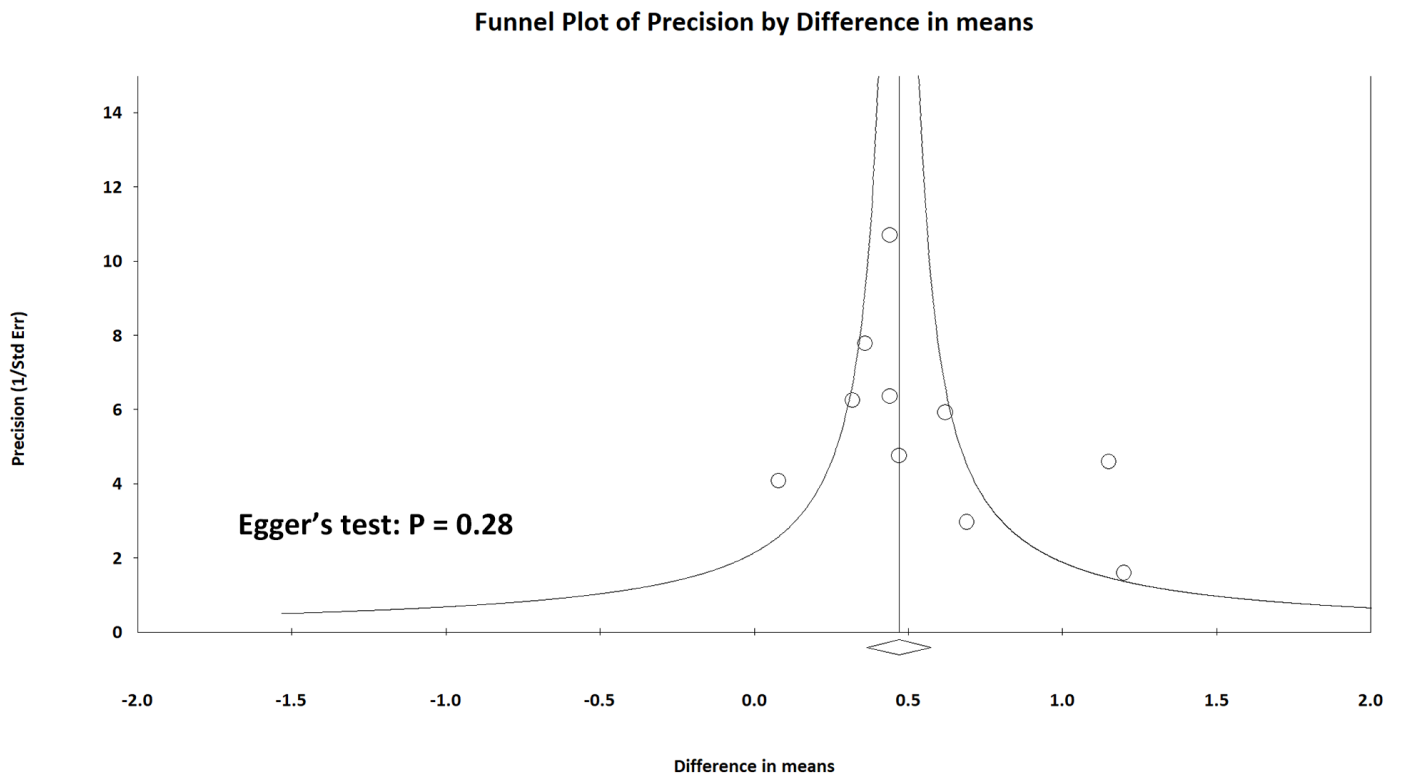

**Figure S3.** Funnel plot of the studies comparing NLR between the osteoporosis and normal BMD groups.

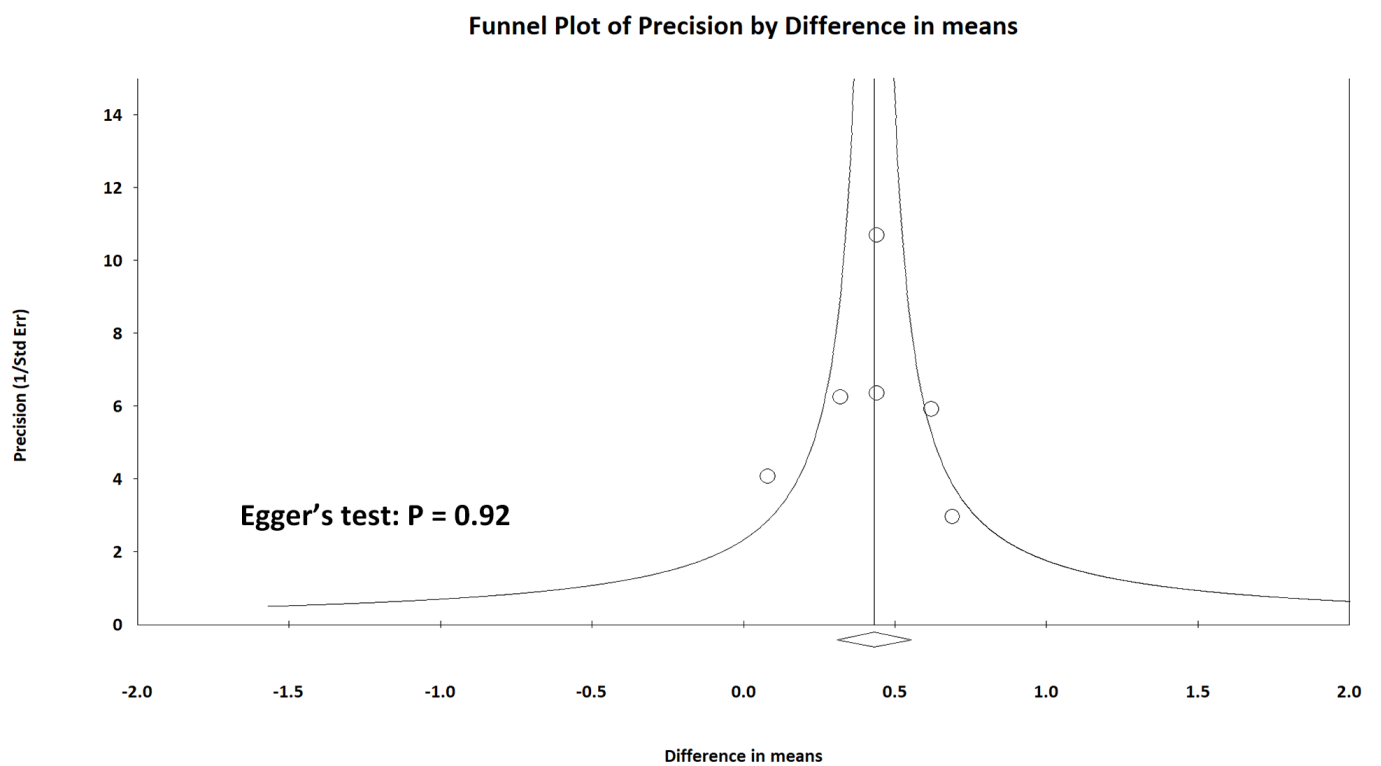

**Figure S4.** Funnel plot of the studies comparing NLR between the osteoporosis and normal BMD groups in postmenopausal women.

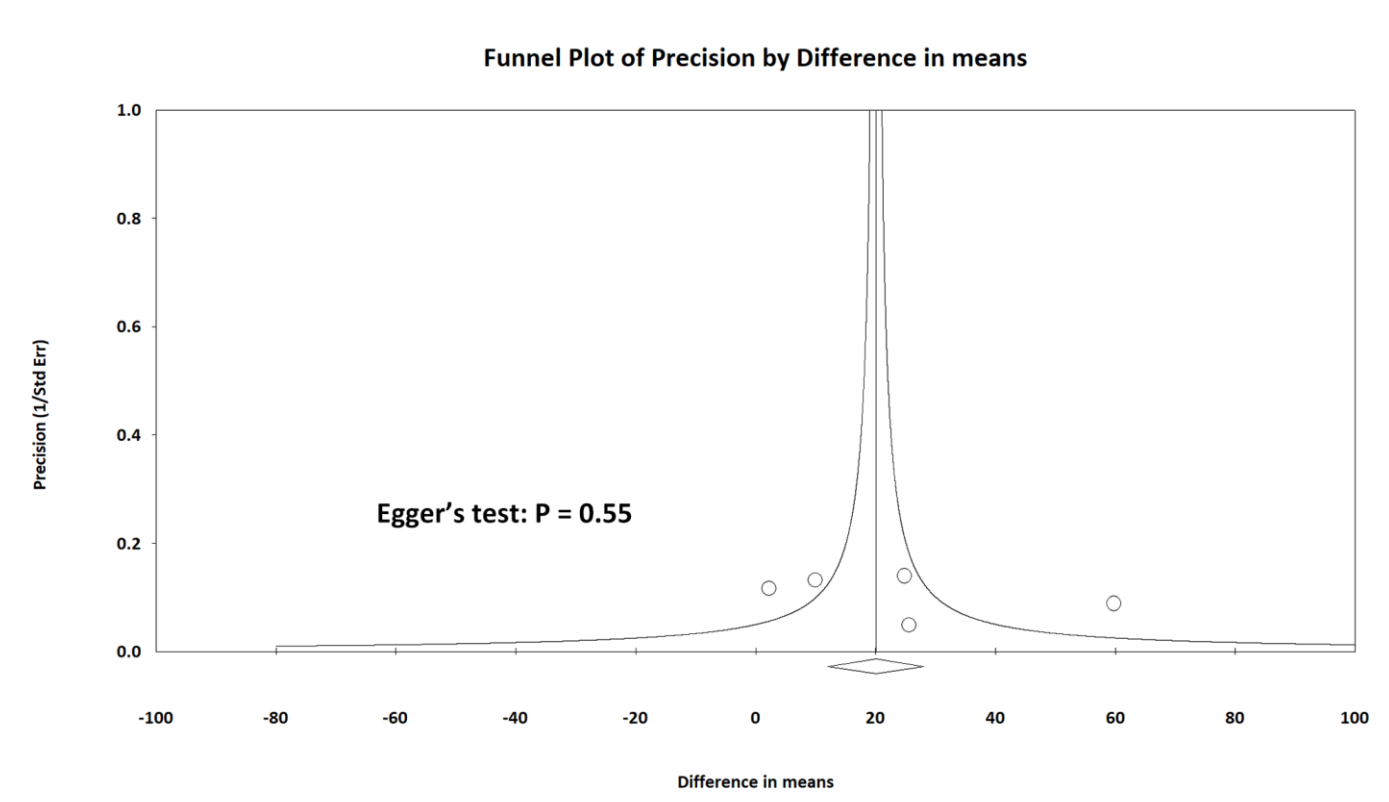

**Figure S5.** Funnel plot of the studies comparing PLR between the osteoporosis and normal BMD groups.

**Table S1:** Methodological quality of the included studies.

| Author (year)              | Risk of bias assessment based on the <b>modified Newcastle–Ottawa Scale</b> |               |         |                       |
|----------------------------|-----------------------------------------------------------------------------|---------------|---------|-----------------------|
|                            | Selection                                                                   | Comparability | Outcome | Total score (quality) |
| Eroglu et al. (2019) [18]  | ***                                                                         | **            | ***     | 8 (high)              |
| Gao et al. (2019) [19]     | ***                                                                         | **            | ***     | 8 (high)              |
| Huang et al. (2016) [20]   | ***                                                                         | --1           | **      | 5 (moderate)          |
| Kale et al. (2021) [21]    | ***                                                                         | *             | ***     | 7 (high)              |
| Onalan et al. (2020) [22]  | ***                                                                         | *             | ***     | 7 (high)              |
| Ozturk et al. (2013) [23]  | ***                                                                         | *             | ***     | 7 (high)              |
| Qin et al. (2021) [24]     | ***                                                                         | **            | ***     | 8 (high)              |
| Salmani et al. (2021) [17] | ***                                                                         | --1           | ***     | 6 (moderate)          |
| Seo et al. (2009) [25]     | ***                                                                         | *             | ***     | 7 (high)              |
| Yu et al. (2015) [26]      | ***                                                                         | **            | ***     | 8 (high)              |

<sup>1</sup> The original study had poor baseline control for potential confounding factors. Each \* represents scoring 1 point for the according questions in each domain.
